# Supplementary material for: A moth odorant receptor highly expressed in the ovipositor is involved in detecting host-plant volatiles
Source: eLife. 2020 May 21;9:e53706. doi: 10.7554/eLife.53706 (PMC7308088; doi:10.7554/eLife.53706)
Supplement: Figure 1—source data 1. [file elife-53706-fig1-data1.xlsx]

## Sheet: Figure1A
	♂Ant-TPM	♀Ant-TPM	Proboscis-TPM	Forelegs-TPM	PGOV-TPM
HassOr31	3.44104	3.49124	0.23758	0.0524926	21.2572
HassOr30	0.494167	0	0	0	0.988757
HassOr2	66.495	58.0732	0.166915	0.190791	0.877709
HassOr44	5.56115	8.03456	0	0.254387	0.588343
HassOr48	0.807848	2.25692	0	0	0.457007
HassOr45	3.38429	14.3797	0	0.0423979	0.214622
HassOr11	4.401	6.89082	0.0475159	0	0.205012
HassOr39	2.19577	8.26701	0	0	0.19647
HassOr20	3.99274	13.9039	0	0	0.159098
HassOr46	2.65211	5.60629	0	0	0.159098
HassOr47	2.39517	10.6451	0	0.380572	0.159098
HassOr52	7.95632	11.5564	0	0	0.121726
HassOr27	0.903213	4.34141	0	0	0.112116
HassOr41	2.74747	5.45459	0.0353324	0	0.112116
HassOr10	1.71106	2.3475	0.249763	0.200885	0.102506
HassOr4	11.3312	18.5487	0.202247	0	0.102506
HassOr9	0	0	0	0	0.102506
HassOr50	0.0953655	0.82943	0	0	0.0747441
HassOr26	1.15936	2.62034	0	0	0.0651341
HassOr29	0	1.61957	0	0.0847958	0.0651341
HassOr40	3.83117	2.72184	0	0	0.046982
HassOr42	4.16377	7.77154	0.0596995	0.317984	0.046982
HassGR9	0.978875	0.677732	0.214431	0	0.886251
HassGR108	0.418505	0	1.59361	0	0.522141
HassGR180	2.31005	1.94261	0.0475159	0.868148	0.317128
HassGR14	0	0	0	3.95815	0.232774
HassGR8	1.27364	0.91019	0.166915	0.465367	0.112116
HassGR67	0	0	0	1.5344	0.0928962
HassIR76b	24.583	7.9025	3.03249	2.38135	6.65329
HassIR7d.2	3.82171	2.20563	1.91404	0.835844	3.69556
HassIR7d.3	0	0.253194	0.856505	0.380572	1.14786
HassIR75d	2.42433	2.6509	0.369162	0.317984	0.709001
HassIR25a	28.9556	49.4318	0.582375	3.38678	0.476227
HassIR143	0.199401	0	0.321646	0	0.438854
HassIR75p.2	3.08953	2.9543	0.166915	0.465367	0.242384
HassIR8a	47.3691	67.4436	0	0.42297	0.149488
HassIR93a	1.53058	2.27657	0	0.116089	0.139878
HassIR1.1	0.978875	1.25506	0	0	0.084354
HassIR7d.1	0.275851	0.658087	0.249763	0.507765	0.0747441
HassIR21a	4.18268	17.597	0.130364	0.0635969	0.0555242
HassIR75q.2	1.16961	0.809785	0	0	0.037372
HassiGluR7	0.133196	0.333955	1.31948	5.39766	23.0489
HassiGluR6	0.0189155	0.132054	0.629891	6.2547	16.9648
HassiGluR12	0.0953655	0.0905825	8.3823	2.30665	11.2629
HassiGluR9	0	0.253194	0.761473	0.444169	6.94266
HassiGluR2	0	0.151698	3.18722	1.74639	5.58018
HassiGluR10	0	0.0403801	1.01124	0.783352	2.31386
HassiGluR4	1.44467	2.35733	1.24882	0.528964	0.951385
HassiGluR8	1.33118	1.326	0.534859	0.0948906	0.149488
HassiGluR3	0.390131	0.930926	0	0	0.037372

## Sheet: Figure1C
	HassOR31			HassORco
	Replicate1	Replicate2	Replicate3	Replicate1	Replicate2	Replicate3
♂Ant	0.0094	0.0106722	0.00982042	0.707107	1.11729	1.21419
♀Ant	0.019	0.0295643	0.0195052	1.13288	0.888843	0.858565
♀Head	0.00118	0.00127084	0.00143972	0.0036	0.00430432	0.00359448
♀Tho	0.00399	0.00739108	0.00433426	0.0026	0.00261314	0.00270529
♀Abd	0.0012	0.00130657	0.00130657	0.0013	0.00148019	0.0014199
♀Leg	0.006	0.00529924	0.00497875	0.00494	0.0066152	0.00501338
♀Wing	0.00108	0.00196671	0.00146997	0.000745	0.00122755	0.00063542
PG-OV	0.14	0.181747	0.123279	0.0031	0.00203607	0.00442533
