# Supplementary material for: A moth odorant receptor highly expressed in the ovipositor is involved in detecting host-plant volatiles
Source: eLife. 2020 May 21;9:e53706. doi: 10.7554/eLife.53706 (PMC7308088; doi:10.7554/eLife.53706)
Supplement: Figure 3—source data 1. [file elife-53706-fig3-data1.xlsx]

## Sheet: Figure3B
Z-3-Hexenyl acetate	Geraniol	Ocimene	Linalool	Citral	Myrcene	Z-3-Hexenyl 2-methyl butyrate	Nonanol	1-Octanol	α-Phellandrene	Z-6-Nonenol	Z-3-Hexenyl-butyrate
217.8	164.6	161.6	54.2	584.7	504.8	153.8	93.4	129.9	65	81	1419.9
249.8	138.4	128.1	128.2	165.4	708	93.5	60.2	65	72.2	71.9	1460.2
112.5	123.8	70	56.5	249	471.2	56.8	40.5	58.9	22.3	65.4	1061.4
128.5					929						877.8
503.4					315.6

## Sheet: Figure3C
	Replicate1	Replicate2	Replicate3	Replicate4
-6	25	15.6	12.8	17.8
-5.5	10.5	19.3	17.1	15.6
-5	27.9	119.4	109.6	111.1
-4.5	379.3	684.9	672.6	390
-4	697	418.7	693.4	759.9
-3.5	883.8	456.5	371.6	291.5
LOG(M)
