# Supplementary material for: A moth odorant receptor highly expressed in the ovipositor is involved in detecting host-plant volatiles
Source: eLife. 2020 May 21;9:e53706. doi: 10.7554/eLife.53706 (PMC7308088; doi:10.7554/eLife.53706)
Supplement: Figure 5—source data 1. [file elife-53706-fig5-data1.xlsx]

## Sheet: Figure5A
PO	Z-3-Hexenyl acetate	Geraniol	Ocimene	Citral	Z-Jasmone	Myrcene	Z-3-Hexenyl 2-methyl butyrate	Z11-16:Ald	Z9-16:Ald	α-Phellandrene	Z-3-Hexenyl butyrate
7	13	10	12	24	24	20	10	24	16	14	24
11	14	12	17	12	11	24	13	20	18	21	24
8	19	27	18	10	18	16	20	13	19	17	23
		17	16						10		21

## Sheet: Figure5C
	Replicate1	Replicate2	Replicate3	Replicate4	Replicate5
1ug	8	17	15	22	15
10ug	11	14	9	18	13
100ug	24	24	23	24	21
1000ug	29	25	25	29	24
Cconcentration
