# Supplementary material for: A moth odorant receptor highly expressed in the ovipositor is involved in detecting host-plant volatiles
Source: eLife. 2020 May 21;9:e53706. doi: 10.7554/eLife.53706 (PMC7308088; doi:10.7554/eLife.53706)
Supplement: Figure 6—source data 1. [file elife-53706-fig6-data1.xlsx]

## Sheet: Figure6A
Paired t test
Intact females			Antennectomized females
Pepper	Control		Pepper	Control
294	98		250	145
626	58		163	141
400	70		299	241
433	53		391	221
198	66		200	159
429	56		178	139
579	127		170	92

## Sheet: Figure6B
Unpaired t test
Intact females	0.5	0.830409	0.702128	0.781893	0.5	0.769072	0.640227
Antennectomized females	0.265823	0.0723684	0.107407	0.277778	0.114206	0.123028	0.29771

## Sheet: Figure6C
Paired t test
Intact females			Antennectomized females
Z-3-Hexenyl butyrate	Paraffin oil		Z-3-Hexenyl butyrate	Paraffin oil
186	83		86	41
94	64		117	68
139	67		66	47
231	116		201	113
141	53		153	55

## Sheet: Figure6D
Unpaired t test
Intact females	0.3829	0.189873	0.349515	0.331412	0.453608
Antennectomized females	0.354331	0.264865	0.168142	0.280255	0.471154
